# Supplementary figures and images for: Untreated Posttraumatic Stress Among Persons With Severe Mental Illness Despite Marked Trauma and Symptomatology
Source: Atypon-hosted journal article supplement (doi:10.1176/ps.62.10.pss6210_1201), 2011-10-01

Figure 1 Consort Chart of Study Recruitment and Completion

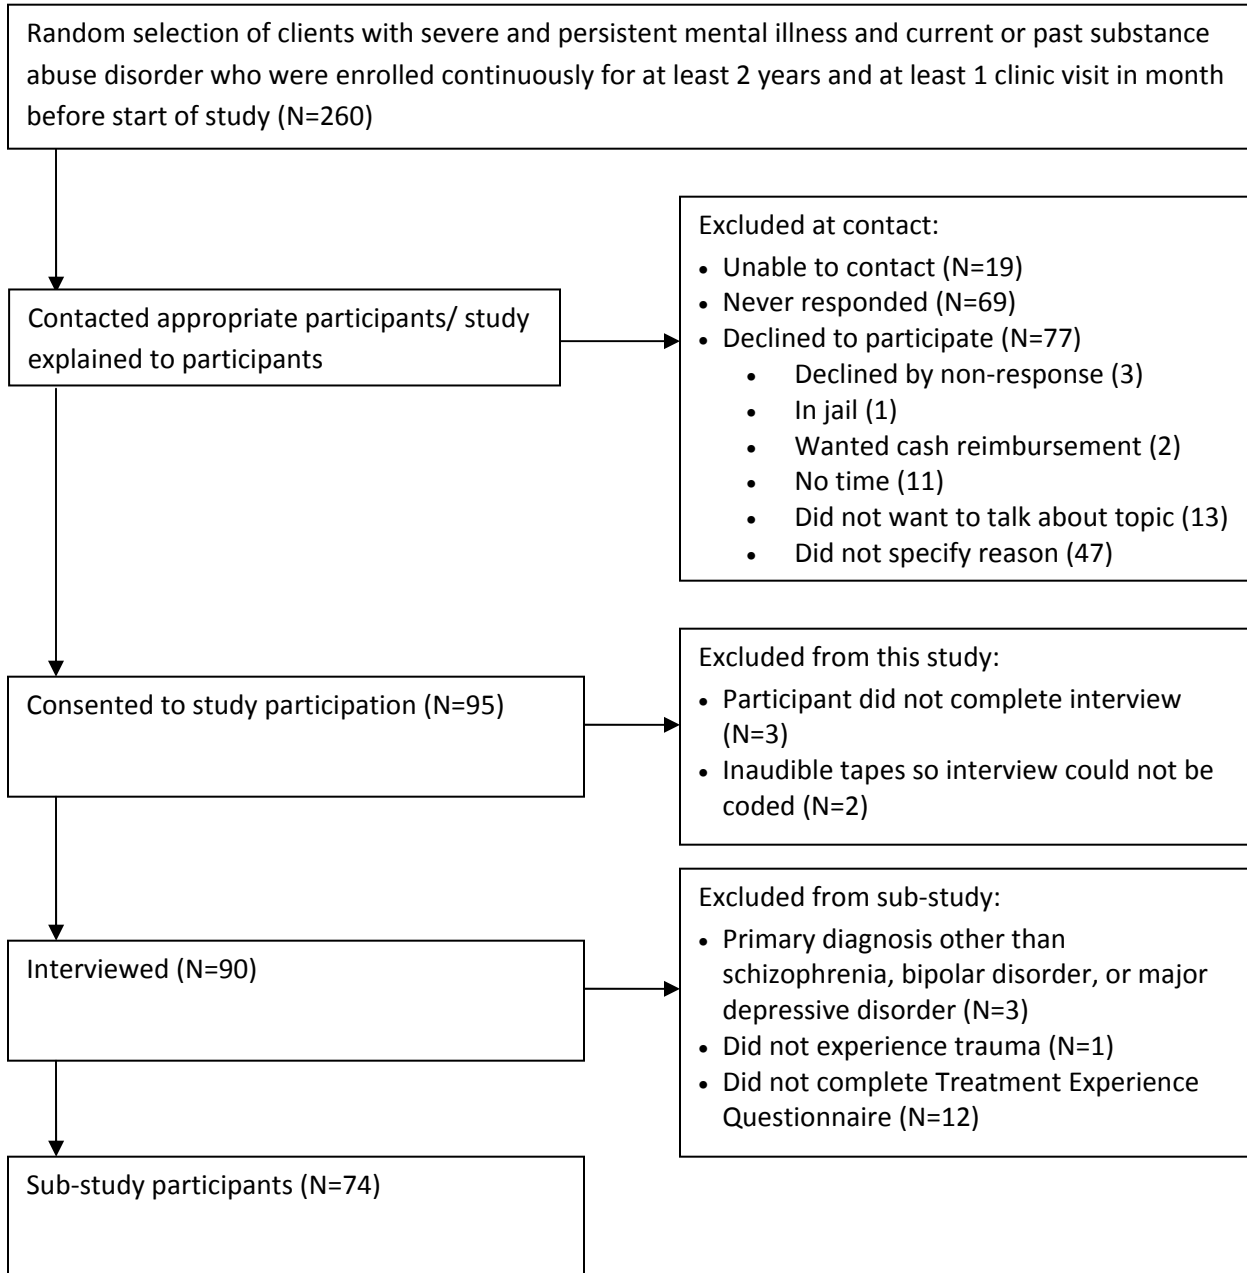

Supplement: Chessen_ds.pdf [file Chessen_ds.pdf]
